# Supplementary material for: Ethyleneglycol tungsten complexes of calix[6 and 8]arenes: synthesis, characterization and ROP of ε-caprolactone
Source: Royal Society of Chemistry journal article supplement (doi:10.1039/c4dt01936a), 2014-01-01
Supplement: c4dt01936a1.pdf [file c4dt01936a1.pdf]

## Electronic Supplementary Information

### Ethyleneglycol Tungsten Complexes of calix[6 and 8]arenes: Synthesis, Characterization and ROP of $\epsilon$ -caprolactone

Yuanzhuo Li,<sup>a</sup> Ke-Qing Zhao,<sup>a</sup> Chun Feng,<sup>a</sup> Mark R.J. Elsegood,<sup>b</sup> Timothy J. Prior,<sup>c</sup> Xinsen Sun,<sup>c</sup>  
and Carl Redshaw<sup>a,c\*</sup>

<sup>a</sup> College of Chemistry and Materials Science, Sichuan Normal University, Chengdu, 610066, China.

<sup>b</sup> Chemistry Department, Loughborough University, Leicestershire, LE11 3TU, UK

<sup>c</sup> Department of Chemistry, University of Hull, Hull, HU6 7RX, UK

**Figure S1.** Crystals of sample 3

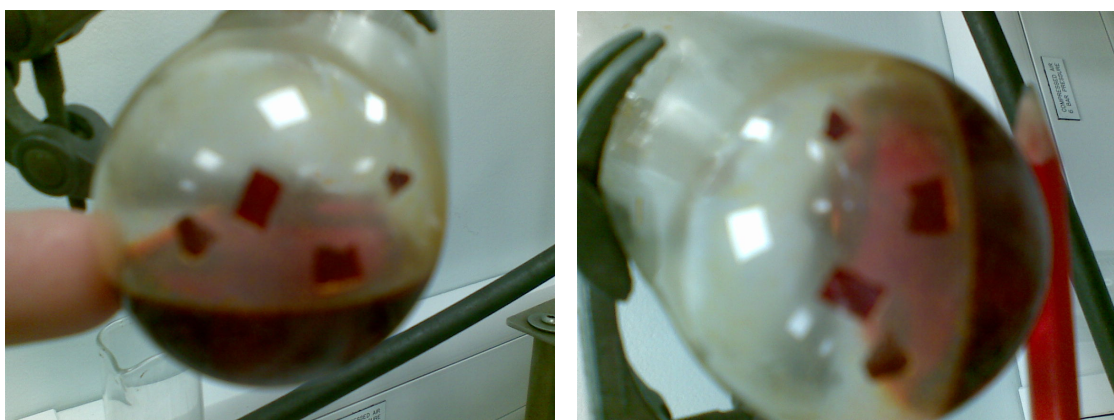

**Figure S2.** Side view of 5

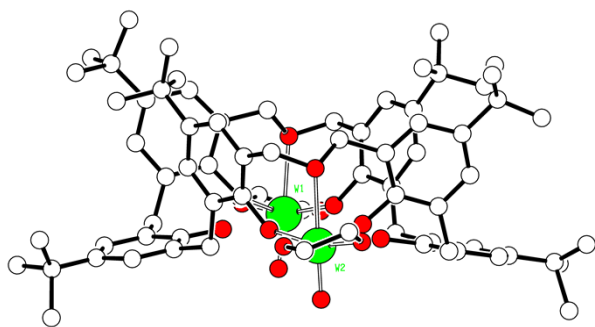

**PCL data:**

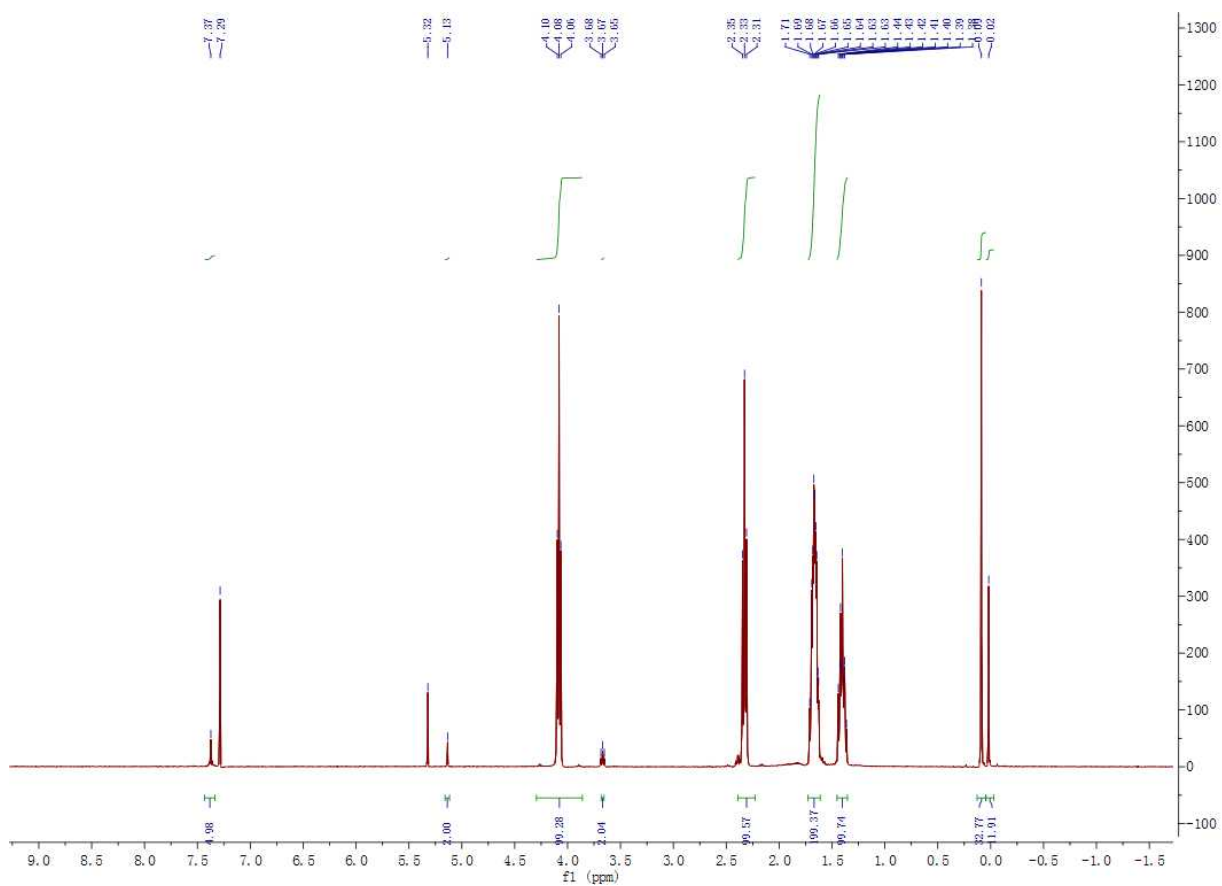

**Figure S3.**  $^1\text{H}$  NMR spectrum of PCL in  $\text{CDCl}_3$  catalyzed by tungsten pre-catalyst **1** with BnOH.

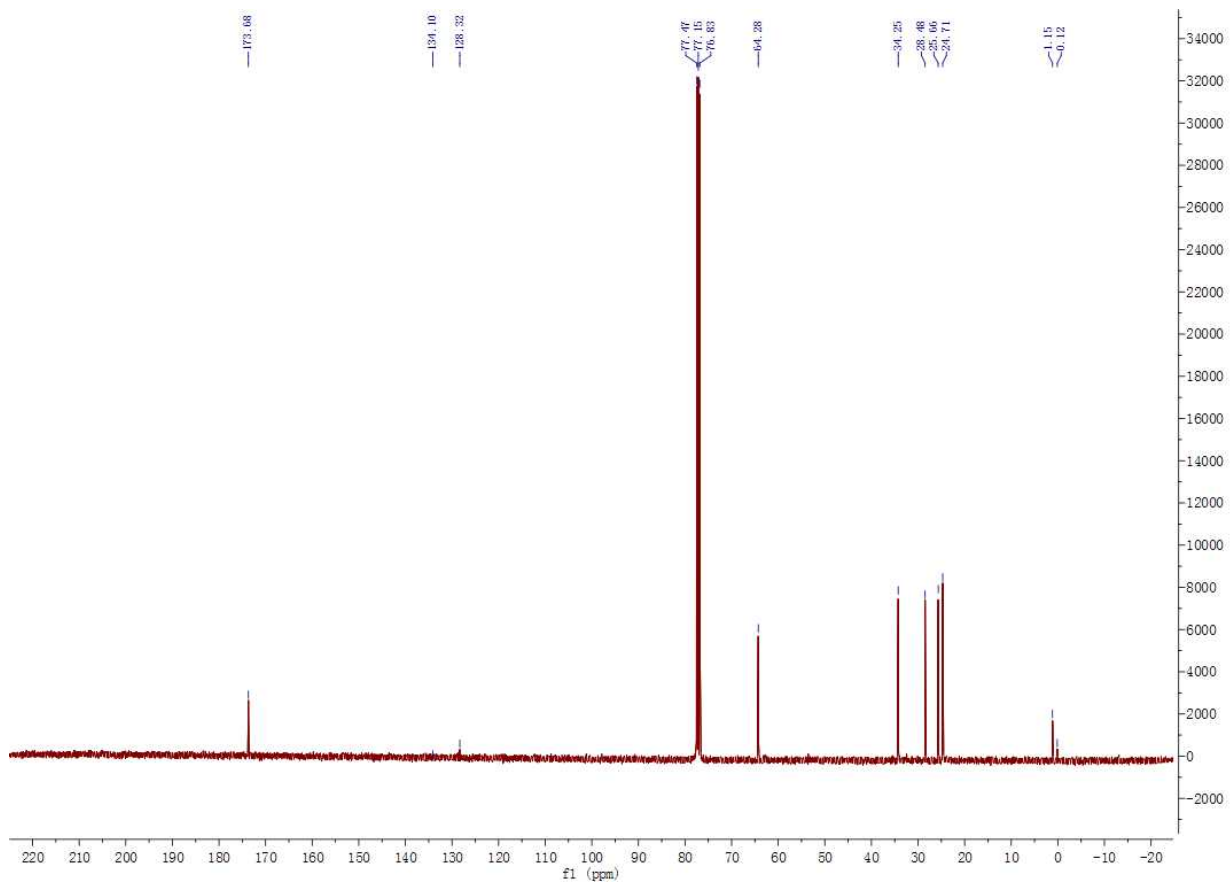

**Figure S4.**  $^{13}\text{C}$  NMR spectrum of PCL in  $\text{CDCl}_3$  catalyzed by tungsten pre-catalyst **1** with BnOH.

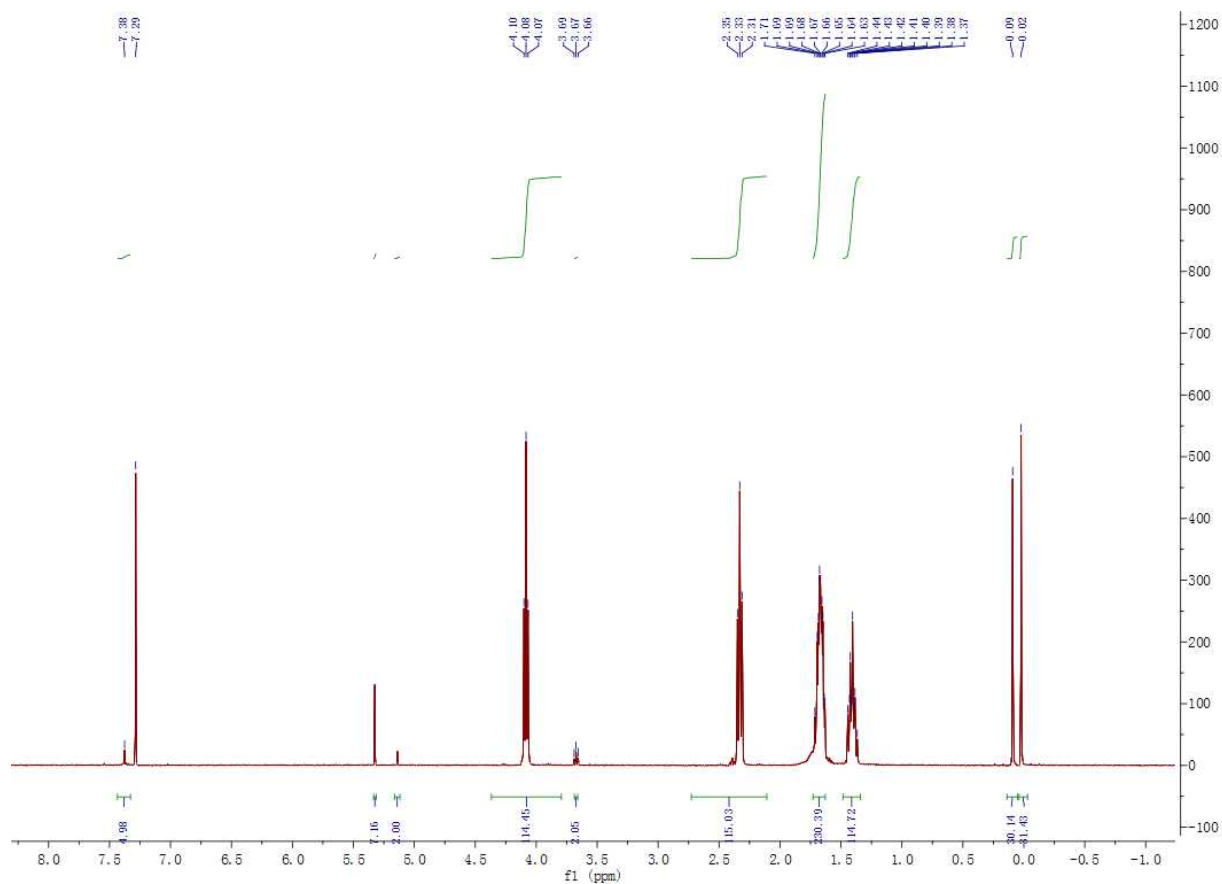

**Figure S5.**  $^1\text{H}$  NMR spectrum of PCL in  $\text{CDCl}_3$  catalyzed by tungsten pre-catalyst **2** with BnOH.

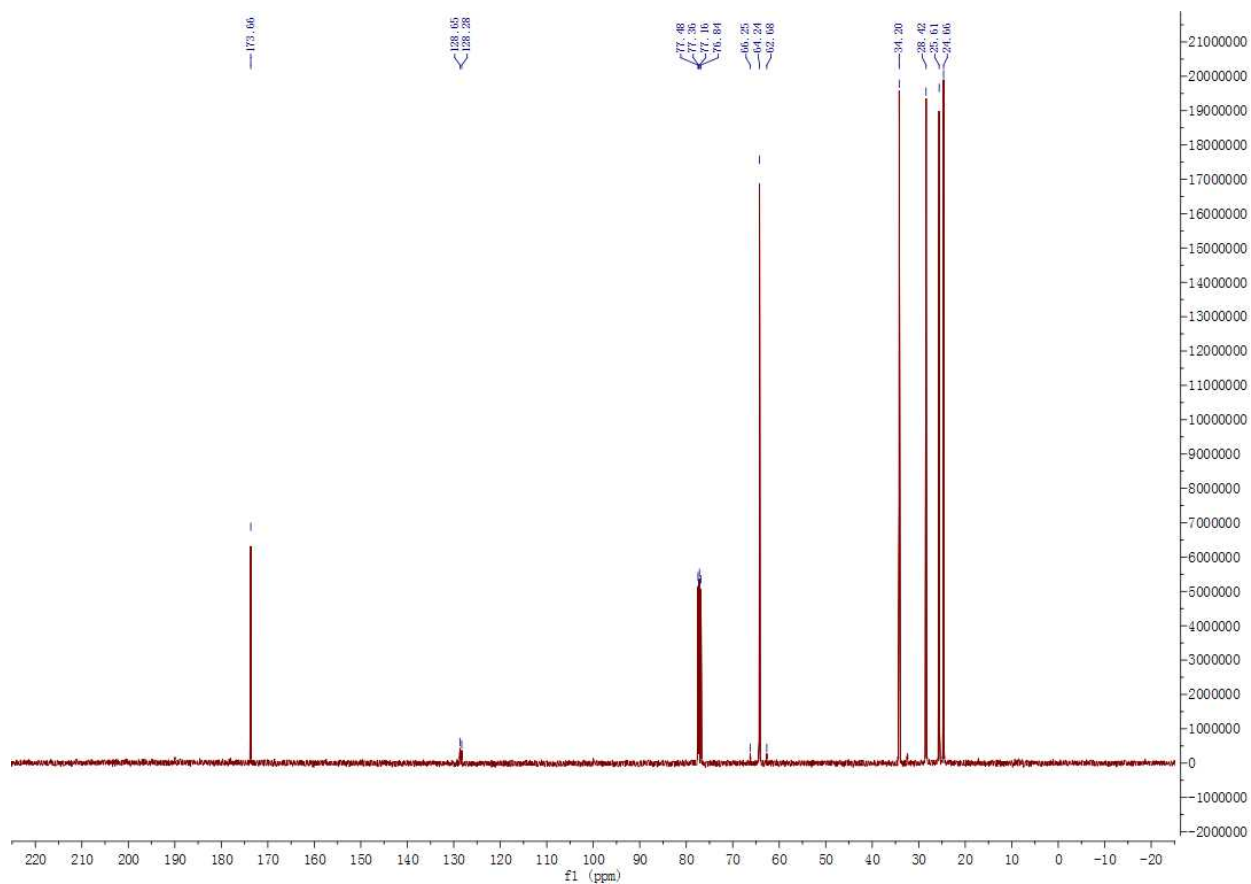

**Figure S6.**  $^{13}\text{C}$  NMR spectrum of PCL in  $\text{CDCl}_3$  catalyzed by tungsten pre-catalyst **2** with BnOH.

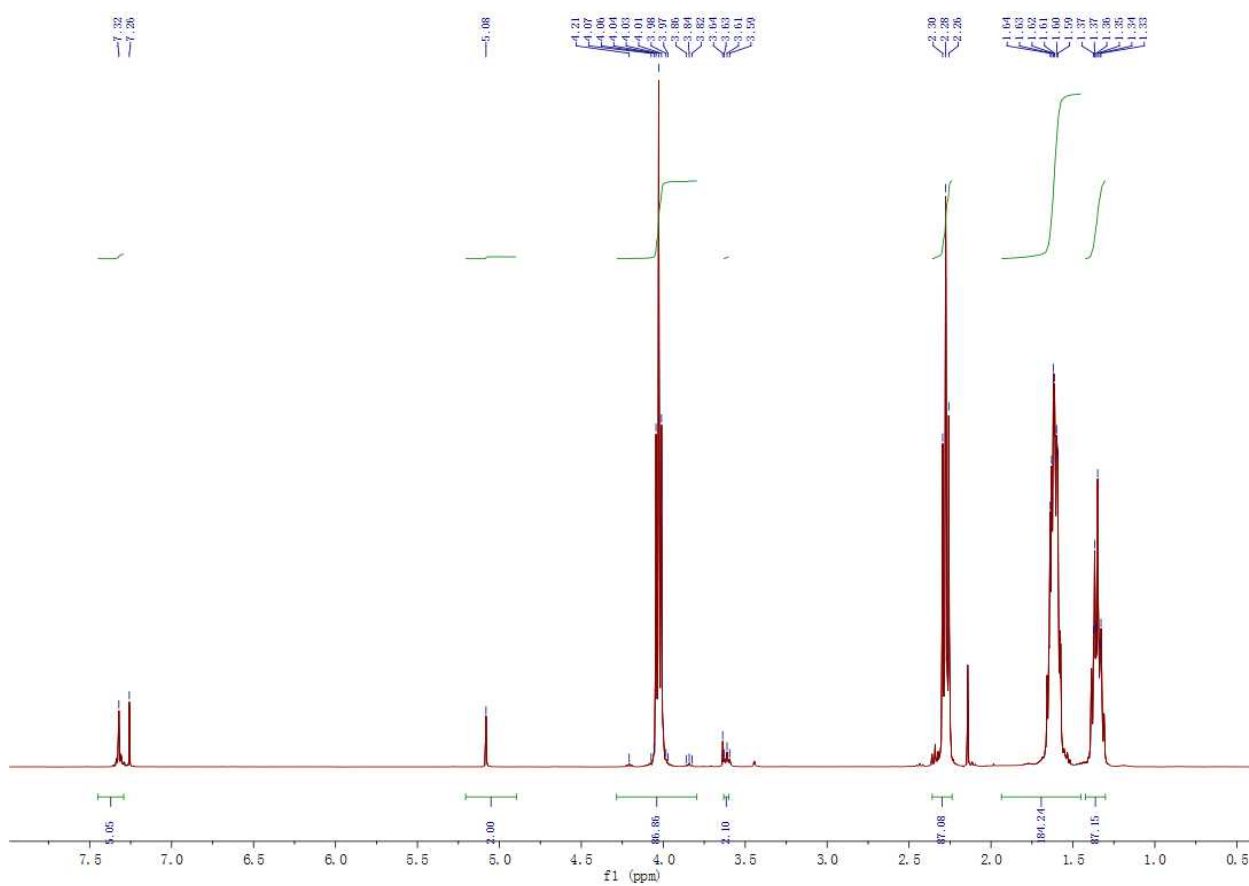

**Figure S7.**  $^1\text{H}$  NMR spectrum of PCL in  $\text{CDCl}_3$  catalyzed by tungsten pre-catalyst **5** with BnOH.

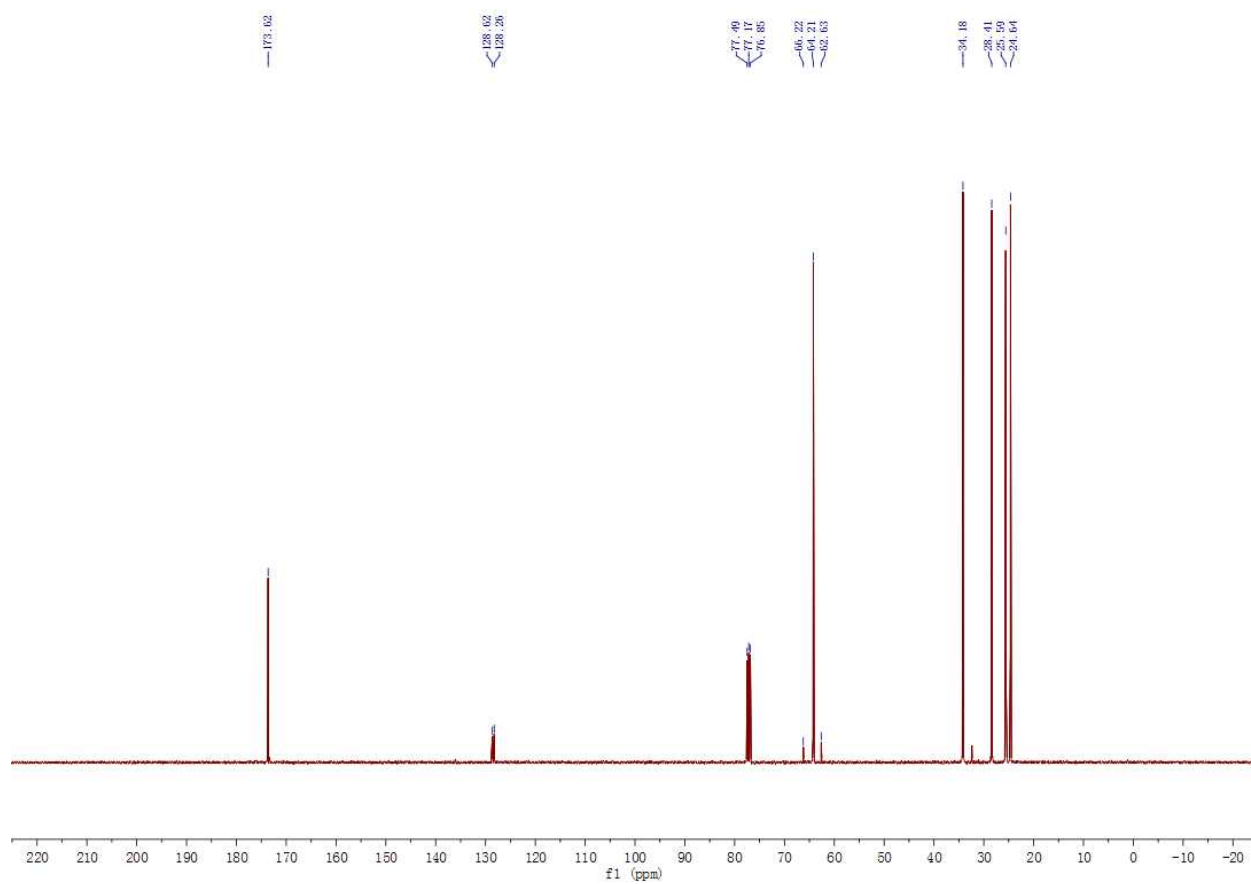

**Figure S8.**  $^{13}\text{C}$  NMR spectrum of PCL in  $\text{CDCl}_3$  catalyzed by tungsten pre-catalyst **5** with BnOH.

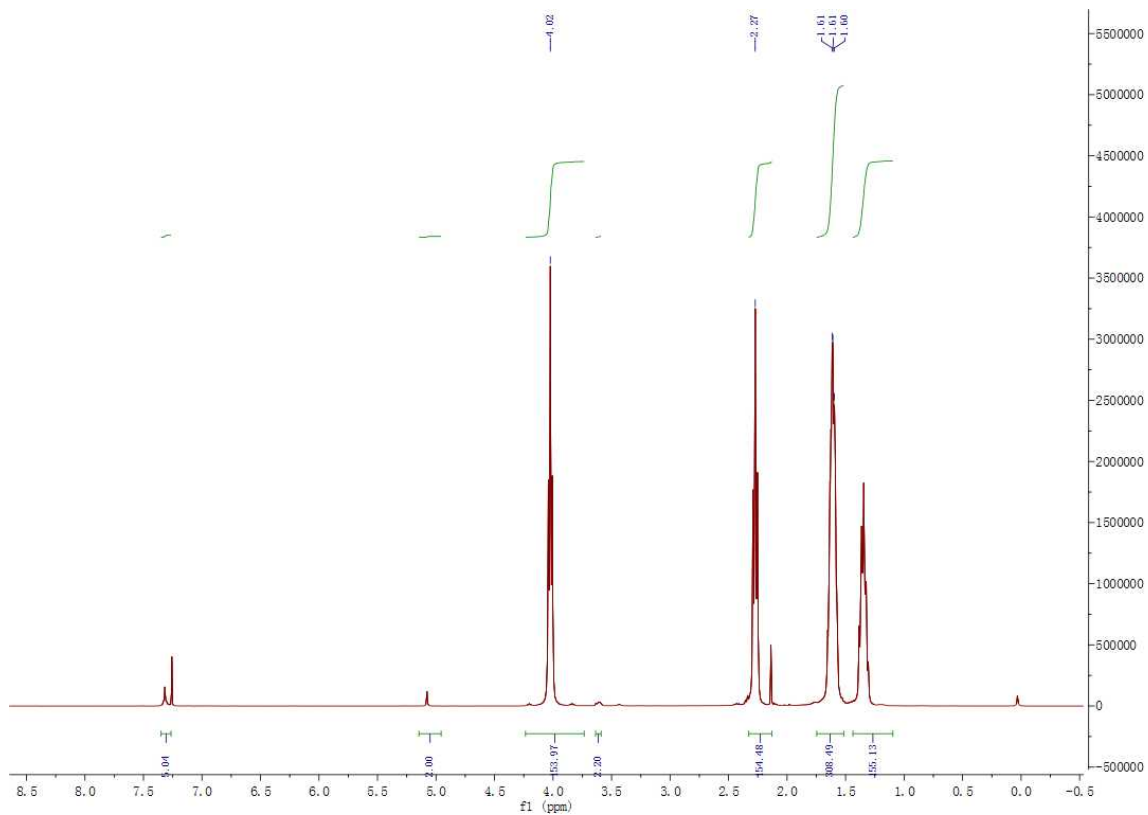

**Figure S9.**  $^1\text{H}$  NMR spectrum of PCL in  $\text{CDCl}_3$  catalyzed by tungsten pre-catalyst **6** with BnOH.



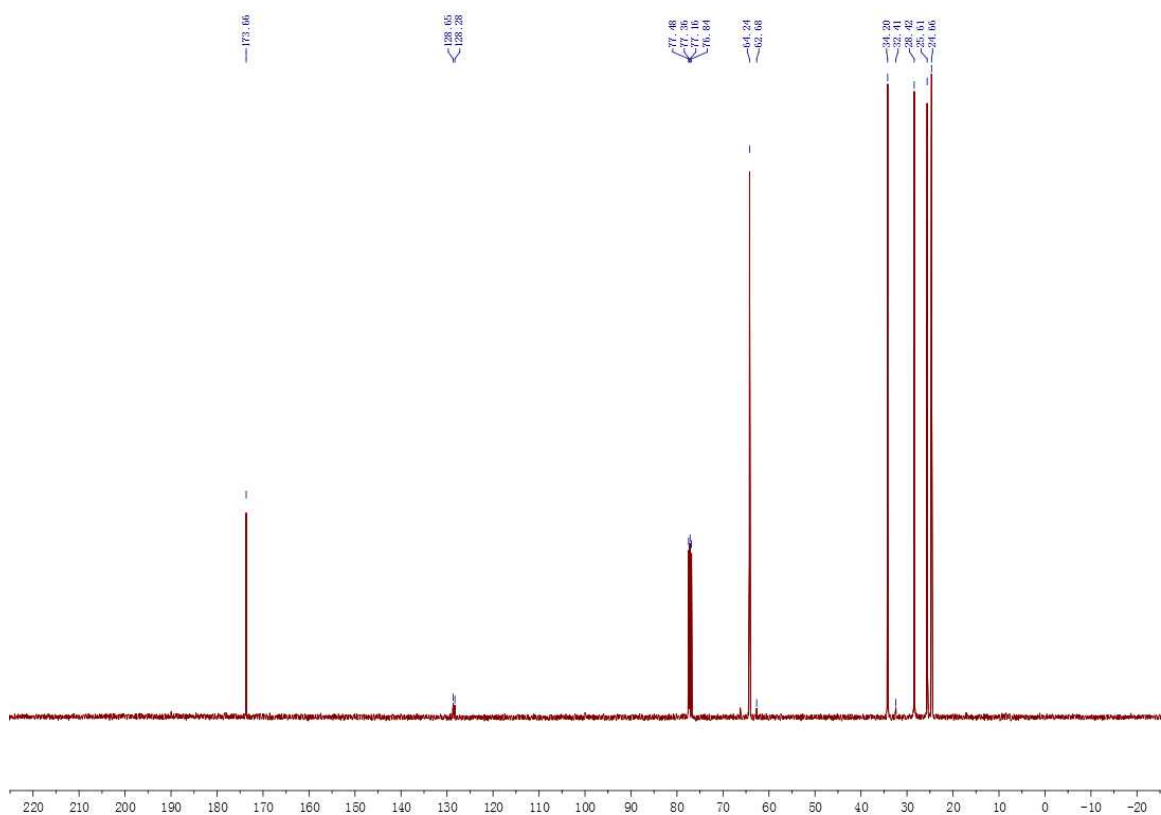

**Figure S10.**  $^{13}\text{C}$  NMR spectrum of PCL in  $\text{CDCl}_3$  catalyzed by tungsten pre-catalyst **6** with BnOH.

## MALDI-TOF,DHB+Na,2,20140520

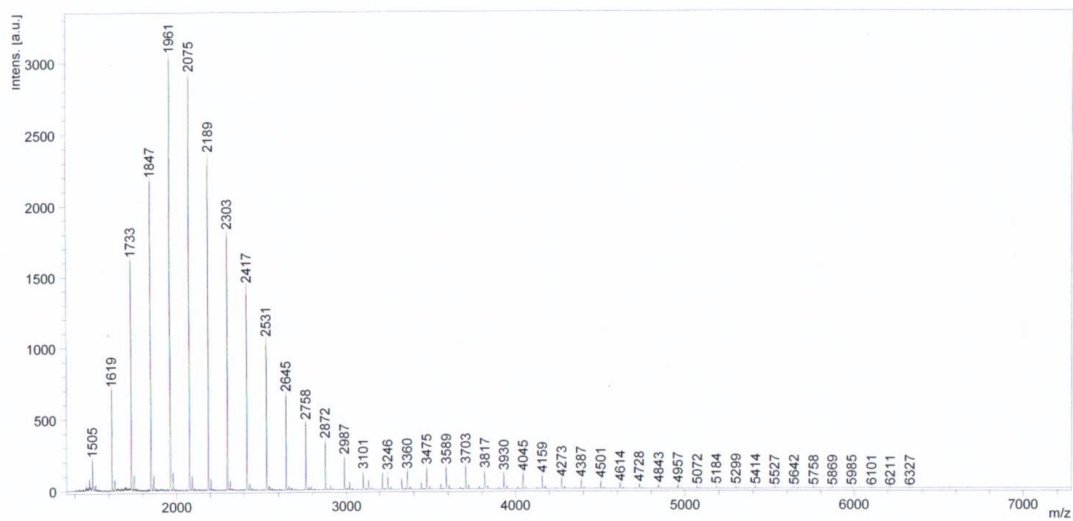

**Figure S11.** MALDI-TOF mass spectrum of PCL initiated by **2** in toluene at 110 °C, [CL]/[**2**]/[BnOH] =400:1:1 (Table 2, entry 3).  $114.14 \cdot n + 108 + 1 + 22$  for BnO-(CL)<sub>n</sub>-H+Na

## MALDI-TOF,DHB+Na,1,20140520

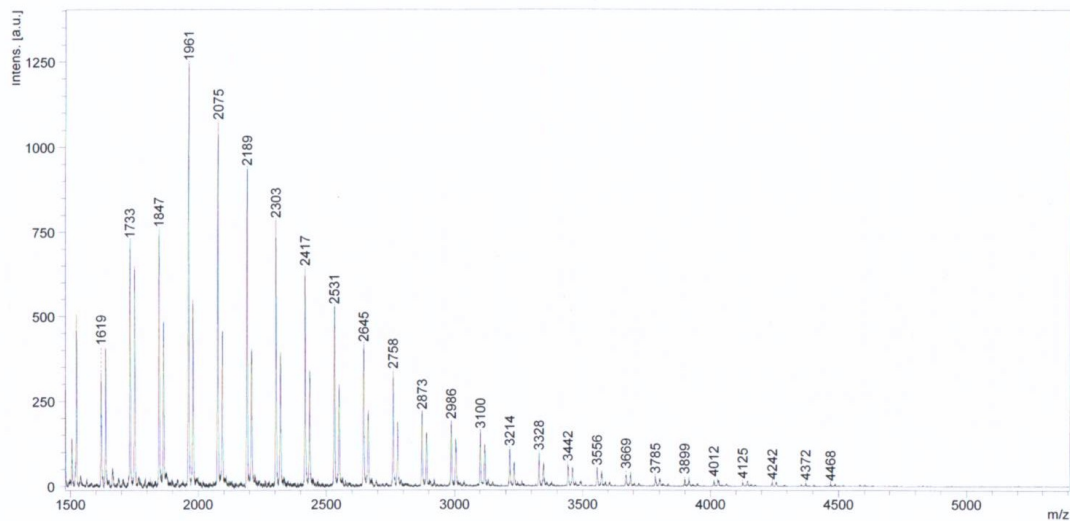

**Figure S12.** MALDI-TOF mass spectrum of PCL initiated by **5** in toluene at 110 °C, [CL]/[**5**]/[BnOH] =400:1:1 (Table 2, entry 5).  $114.14 \cdot n + 108 + 1 + 22$  for BnO-(CL)<sub>n</sub>-H+Na

## MALDI-TOF,CCA,w4,20140617

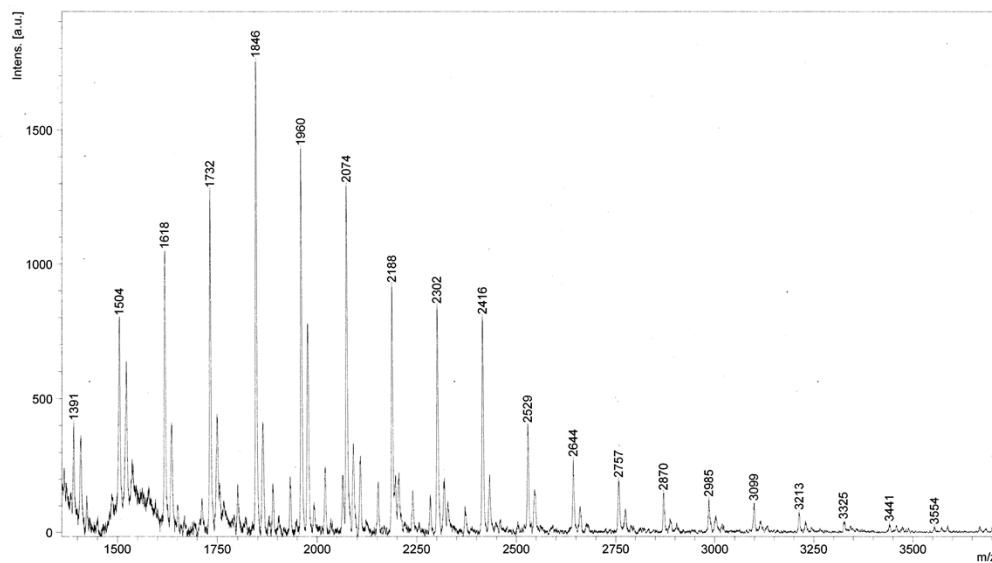

**Figure S13.** MALDI-TOF mass spectrum of PCL initiated by **6** in toluene at 110 °C, [CL]/[**6**]/[BnOH] =400:1:1 (Table 2, entry 6).  $114.14 \cdot n + 108 + 1 + 22$  for BnO-(CL) $_n$ -H+Na
